# Supplementary material for: Earth-abundant Cu-based chalcogenide semiconductors as photovoltaic absorbers
Source: Royal Society of Chemistry journal article supplement (doi:10.1039/c2tc00106c), 2012-10-30
Supplement: c2tc00106c.pdf [file c2tc00106c.pdf]

## Supplementary information

### Earth-abundant Cu-based chalcogenide semiconductors as photovoltaic absorbers

Vorranutch Itthibenchapong,<sup>a</sup> Robert S. Kokenyesi,<sup>a</sup> Andrew J. Ritenour,<sup>b</sup> Lev N. Zakharov,<sup>c</sup>  
Shannon W. Boettcher,<sup>b</sup> John F. Wager<sup>d</sup> and Douglas A. Keszler<sup>\*a</sup>

<sup>a</sup> Department of Chemistry, Oregon State University, 153 Gilbert Hall, Corvallis, OR, 97331-4003 USA.

<sup>b</sup> Department of Chemistry, University of Oregon, 355D Klamath Hall, Eugene, OR, 97403-1253 USA.

<sup>c</sup> Center for Advanced Materials Characterization in Oregon (CAMCOR),

1241 University of Oregon, Eugene, OR, 97403-1241 USA.

<sup>d</sup> School of Electrical Engineering and Computer Science, Oregon State University, 1148 Kelley Engineering Center, Corvallis, OR, 97331-5501 USA.

Corresponding E-mail: douglas.keszler@oregonstate.edu

**Table S1** Selected bond angles (°) for  $\text{Cu}_3\text{PS}_{1.89}\text{Se}_{2.11}$  and  $\text{Cu}_3\text{PS}_{0.71}\text{Se}_{3.29}$  (Q = S, Se).

|                 | $\text{Cu}_3\text{PS}_{1.89}\text{Se}_{2.11}$ | $\text{Cu}_3\text{PS}_{0.71}\text{Se}_{3.29}$ |
|-----------------|-----------------------------------------------|-----------------------------------------------|
| Q(1)-Cu(1)-Q(2) | 113.25(6)                                     | 112.34(6)                                     |
| Q(1)-Cu(1)-Q(3) | 110.12(3)                                     | 110.53(4)                                     |
| Q(2)-Cu(1)-Q(3) | 107.94(4)                                     | 107.70(4)                                     |
| Q(3)-Cu(1)-Q(3) | 107.26(5)                                     | 107.88(6)                                     |
| Q(1)-Cu(2)-Q(2) | 108.37(4)                                     | 108.18(4)                                     |
| Q(1)-Cu(2)-Q(3) | 114.20(4)                                     | 113.70(4)                                     |
|                 | 103.51(4)                                     | 103.50(4)                                     |
| Q(2)-Cu(2)-Q(3) | 113.88(4)                                     | 114.39(5)                                     |
|                 | 110.57(4)                                     | 110.38(4)                                     |
| Q(3)-Cu(2)-Q(3) | 105.77(3)                                     | 106.11(3)                                     |
| Q(1)-P-Q(2)     | 112.21(9)                                     | 112.22(10)                                    |
| Q(1)-P-Q(3)     | 108.35(6)                                     | 108.17(8)                                     |
| Q(2)-P-Q(3)     | 109.11(6)                                     | 109.27(9)                                     |
| Q(3)-P-Q(3)     | 109.70(8)                                     | 109.73(10)                                    |

**Table S2** Anisotropic displacement parameters ( $\text{\AA}^2 \times 10^3$ ) for  $\text{Cu}_3\text{PS}_{1.89}\text{Se}_{2.11}$  and  $\text{Cu}_3\text{PS}_{0.71}\text{Se}_{3.29}$  (Q = S, Se). The anisotropic displacement factor exponent takes the form:  $-2\pi^2[ h^2a^{*2}U^{11} + \dots + 2 h k a^* b^* U^{12} ]$

| Atom                                          | $U^{11}$ | $U^{22}$ | $U^{33}$ | $U^{23}$ | $U^{13}$ | $U^{12}$ |
|-----------------------------------------------|----------|----------|----------|----------|----------|----------|
| $\text{Cu}_3\text{PS}_{1.89}\text{Se}_{2.11}$ |          |          |          |          |          |          |
| Cu (1)                                        | 29(1)    | 25(1)    | 24(1)    | 2(1)     | 0        | 0        |
| Cu (2)                                        | 27(1)    | 27(1)    | 23(1)    | -1(1)    | -1(1)    | -1(1)    |
| P                                             | 8(1)     | 8(1)     | 8(1)     | 1(1)     | 0        | 0        |
| S (1)                                         | 13(1)    | 16(1)    | 10(1)    | 0(1)     | 0        | 0        |
| Se (1)                                        | 13(1)    | 16(1)    | 10(1)    | 0(1)     | 0        | 0        |
| S (2)                                         | 15(1)    | 12(1)    | 13(1)    | -1(1)    | 0        | 0        |
| Se (2)                                        | 15(1)    | 12(1)    | 13(1)    | -1(1)    | 0        | 0        |
| S (3)                                         | 12(1)    | 13(1)    | 13(1)    | 0(1)     | -1(1)    | -2(1)    |
| Se (3)                                        | 12(1)    | 13(1)    | 13(1)    | 0(1)     | -1(1)    | -2(1)    |
| $\text{Cu}_3\text{PS}_{0.71}\text{Se}_{3.29}$ |          |          |          |          |          |          |
| Cu (1)                                        | 28(1)    | 25(1)    | 22(1)    | 3(1)     | 0        | 0        |
| Cu (2)                                        | 28(1)    | 26(1)    | 20(1)    | -1(1)    | 0(1)     | -1(1)    |
| P                                             | 10(1)    | 11(1)    | 6(1)     | 1(1)     | 0        | 0        |
| S (1)                                         | 13(1)    | 17(1)    | 9(1)     | 0(1)     | 0        | 0        |
| Se (1)                                        | 13(1)    | 17(1)    | 9(1)     | 0(1)     | 0        | 0        |
| S (2)                                         | 15(1)    | 12(1)    | 13(1)    | -1(1)    | 0        | 0        |
| Se (2)                                        | 15(1)    | 12(1)    | 13(1)    | -1(1)    | 0        | 0        |
| S (3)                                         | 12(1)    | 13(1)    | 14(1)    | 0(1)     | -1(1)    | -2(1)    |
| Se (3)                                        | 12(1)    | 13(1)    | 14(1)    | 0(1)     | -1(1)    | -2(1)    |
